# Supplementary material
Source: PubMed Central journal article supplement (PMC4054237)
Supplement: CVI.00009-14_zcd999095002so1.pdf [file CVI.00009-14_zcd999095002so1.pdf]

1 **Table S1:** Plasma cytokine and chemokine concentrations in sub-microscopic infected group  
 2 compared to uninfected at inclusion and at delivery

| Variables<br>(med, ir) | Inclusion            |                           |               | Delivery             |                           |      |
|------------------------|----------------------|---------------------------|---------------|----------------------|---------------------------|------|
|                        | Uninfected<br>(n=52) | Sub-microscopic<br>(n=18) | p             | Uninfected<br>(n=54) | Sub-microscopic<br>(n=20) | p    |
| IL-1 $\beta$           | 1.0 (0)              | 1.0 (0)                   | 0.70          | 1.0 (0)              | 1.0 (0.2)                 | 0.73 |
| IL-6                   | 1.0 (0)              | 1.0 (0)                   | 0.93          | 12.1 (15.0)          | 10.3 (16.1)               | 0.88 |
| IL-8                   | 9.6 (12.3)           | 9.6 (7.1)                 | 0.83          | 114.0 (423.2)        | 122.2 (243.6)             | 0.89 |
| IL-10                  | 1.0 (0)              | 3.1 (9.6)                 | <b>0.0002</b> | 1.9 (2.6)            | 2.3 (2.8)                 | 0.14 |
| IL-12p70               | 1.0 (0)              | 1.0 (0)                   | 0.29          | 1.0 (0)              | 1.0 (0)                   | 0.42 |
| TNF- $\alpha$          | 1.0 (0)              | 1.0 (0)                   | 0.72          | 1.0 (0)              | 1.0 (0)                   | 0.24 |
| RANTES                 | 58383<br>(61130)     | 68799 (67151)             | 0.30          | 64620<br>(63760)     | 58422 (79230)             | 0.40 |
| MIG                    | 2272 (1701)          | 2210 (3909)               | 0.21          | 1242 (746)           | 1143 (1308)               | 0.84 |
| MCP-1                  | 1.0 (2.3)            | 1.0 (0)                   | 0.73          | 10.4 (10.0)          | 8.9 (25.2)                | 0.53 |
| IP-10                  | 1806 (969)           | 1926 (1290)               | 0.62          | 1790 (1165)          | 1954 (779)                | 0.81 |
| Ang-1                  | 18844 (4459)         | 19500 (2676)              | 0.45          | 20005<br>(21454)     | 26499 (25674)             | 0.63 |
| uPAR                   | 2047 (754)           | 2173 (596)                | 0.51          | 2014 (1215)          | 2088 (1542)               | 0.97 |
| IFN- $\alpha$          | 3.5 (0)              | 3.5 (0)                   | 0.54          | 3.5 (5.5)            | 4.8 (37.8)                | 0.23 |
| IFN- $\gamma$          | 1.0 (0)              | 1.0 (0)                   | 0.65          | 1.0 (6.5)            | 1.0 (6.6)                 | 0.91 |
| sVEGF-<br>R1/Flt1      | 748 (1244)           | 758 (625)                 | 0.76          | 4547 (4759)          | 5851 (5788)               | 0.68 |

3  
 4  
 5  
 6  
 7

8 **Table S2:** Peripheral blood cellular profiles in sub-microscopic infected group compared to  
9 uninfected at inclusion and at delivery

| Variables<br>(med, ir) | Inclusion            |                           |      | Delivery             |                           |      |
|------------------------|----------------------|---------------------------|------|----------------------|---------------------------|------|
|                        | Uninfected<br>(n=52) | Sub-microscopic<br>(n=18) | p*   | Uninfected<br>(n=54) | Sub-microscopic<br>(n=20) | p*   |
| Monocytes              | 7.6 (7.7)            | 8.3 (7.0)                 | 0.74 | 9.5 (7.4)            | 9.8 (5.0)                 | 0.7  |
| B cells                | 12.5 (6.5)           | 11.3 (5.0)                | 0.77 | 11.8 (4.9)           | 12.5 (7.4)                | 0.4  |
| myelDC                 | 0.3 (0.2)            | 0.3 (0.1)                 | 0.93 | 0.3 (0.1)            | 0.2 (0.2)                 | 0.7  |
| plasmDC                | 0.4 (0.3)            | 0.4 (0.4)                 | 0.87 | 0.3 (0.3)            | 0.3 (0.4)                 | 0.9  |
| MonoCD86               | 7.0 (3.7)            | 5.6 (3.2)                 | 0.22 | 5.0 (3.2)            | 5.2 (1.9)                 | 0.9  |
| BcellCD86              | 0.9 (0.9)            | 0.7 (0.6)                 | 0.61 | 0.9 (0.8)            | 0.9 (1.2)                 | 0.9  |
| myelDCCD86             | 0.8 (1.3)            | 0.5 (1.0)                 | 0.28 | 1.3 (2.2)            | 1.2 (1.4)                 | 0.9  |
| plasmDCCD86            | 0.8 (1.3)            | 0.8 (0.6)                 | 0.32 | 1.1 (1.2)            | 1.0 (0.8)                 | 0.9  |
| MonoHLADR              | 39.2 (20.3)          | 37.2 (23.4)               | 0.50 | 32.7 (24.1)          | 40.7 (36.2)               | 0.3  |
| BcellHLADR             | 56.5 (20.3)          | 61.5 (34.8)               | 0.37 | 62.6 (30.7)          | 58.3 (44.5)               | 0.5  |
| myelDCHLADR            | 148.6 (49.2)         | 148.5 (53.7)              | 0.85 | 139.2 (74.3)         | 143.3 (142.1)             | 0.6  |
| plasmDCHLADR           | 54.2 (31.7)          | 57.2 (35.3)               | 0.37 | 40.6 (31.5)          | 50.5 (27.1)               | 0.06 |
| Treg                   | 3.8 (2.0)            | 4.6 (1.7)                 | 0.49 | 3.6 (2.4)            | 3.4 (2.3)                 | 0.7  |
| Teff                   | 4.0 (5.2)            | 4.7 (6.5)                 | 0.74 | 1.6 (2.0)            | 2.1 (1.6)                 | 0.2  |
| RatioTregTeff          | 0.9 (1.8)            | 0.9 (1.5)                 | 0.94 | 2.3 (2.3)            | 1.5 (1.5)                 | 0.1  |
| RTreg                  | 2.3 (2.7)            | 1.9 (1.3)                 | 0.26 | 1.6 (0.6)            | 1.8 (0.7)                 | 0.2  |
| RTeff                  | 1.2 (0.2)            | 1.3 (0.3)                 | 0.54 | 1.3 (0.2)            | 1.4 (0.5)                 | 0.07 |
| NK                     | 4.8 (4.3)            | 3.6 (2.8)                 | 0.21 | 5.3 (5.3)            | 3.7 (6.9)                 | 0.08 |
| CD3                    | 67.9 (14.6)          | 66.2 (14.2)               | 0.30 | 65.0 (11.7)          | 62.4 (19.9)               | 0.4  |
| NKT                    | 1.5 (1.6)            | 1.7 (0.9)                 | 0.96 | 2.4 (1.5)            | 1.8 (2.6)                 | 0.1  |
| CD4                    | 63.6 (10.4)          | 59.2 (14.7)               | 0.06 | 56.7 (12.7)          | 59.7 (13.5)               | 0.5  |
| CD8                    | 27.4 (9.1)           | 25.6 (10.4)               | 0.80 | 31.7 (13.4)          | 32.2 (10.4)               | 0.4  |
| RatioCD4CD8            | 2.3 (1.2)            | 2.3 (1.0)                 | 0.38 | 1.8 (1.2)            | 1.7 (1.3)                 | 0.4  |

12 **Table S3:** Plasma cytokine and chemokine concentrations in those with sub-microscopic  
13 infections compared to those with microscopically-detectable infections at inclusion and at  
14 delivery

| Variables<br>(med, ir) | Inclusion              |                    |               | Delivery               |                    |               |
|------------------------|------------------------|--------------------|---------------|------------------------|--------------------|---------------|
|                        | Sub-infected<br>(n=18) | Infected<br>(n=62) | p*            | Sub-infected<br>(n=20) | Infected<br>(n=37) | p*            |
| IL-1 $\beta$           | 1.0 (0)                | 1.0 (0)            | 0.52          | 1.0 (0.2)              | 1.0 (0.6)          | 0.61          |
| IL-6                   | 1.0 (0)                | 1.1 (2.6)          | <b>0.005</b>  | 10.3 (16.1)            | 16.8 (45.6)        | 0.20          |
| IL-8                   | 9.6 (7.1)              | 14.5 (17.4)        | 0.14          | 122.2 (243.6)          | 97.2 (385.1)       | 0.99          |
| IL-10                  | 3.1 (9.6)              | 16.3 (29.2)        | <b>0.0001</b> | 2.3 (2.8)              | 16.3 (50.1)        | <b>0.002</b>  |
| IL-12p70               | 1.0 (0)                | 1.0 (0)            | 0.13          | 1.0 (0)                | 1.0 (0)            | 0.90          |
| TNF- $\alpha$          | 1.0 (0)                | 1.0 (0)            | 0.37          | 1.0 (0)                | 1.0 (0)            | 0.95          |
| RANTES                 | 68799 (67151)          | 58918 (72966)      | 0.21          | 58422 (79230)          | 50839 (46960)      | 0.89          |
| MIG                    | 2210 (3909)            | 3527 (2202)        | 0.27          | 1143 (1308)            | 4303 (4879)        | <b>0.0001</b> |
| MCP-1                  | 1.0 (0)                | 1.0 (4.5)          | 0.26          | 8.9 (25.2)             | 16.1 (23.7)        | 0.15          |
| IP-10                  | 1926 (1290)            | 2866 (1817)        | <b>0.002</b>  | 1954 (780)             | 3540 (3903)        | <b>0.0008</b> |
| Ang-1                  | 19500 (2676)           | 18854 (7953)       | 0.63          | 26499 (25674)          | 13695 (11270)      | 0.29          |
| uPAR                   | 2173 (596)             | 2150<br>(977)      | 0.95          | 2088 (1542)            | 2696 (2319)        | 0.16          |
| IFN- $\alpha$          | 3.5 (0)                | 3.5 (0)            | 0.85          | 4.8 (37.8)             | 3.5 (1.5)          | <b>0.02</b>   |
| IFN- $\gamma$          | 1.0 (0)                | 1.0 (0)            | 0.96          | 1.0 (6.6)              | 1.0 (0)            | 0.11          |
| VEGF/Flt1              | 757 (625)              | 734 (1380)         | 0.86          | 5851 (5788)            | 39.8 (6375)        | 0.68          |

15 **Table S4:** Pair-wise correlation coefficients of plasma cytokine and chemokine concentrations at  
 16 inclusion included in multivariate models (Bonferroni adjustment)

17

|       | IL-8<br>Coefficient<br>P<br>N | IL-6<br>Coefficient<br>P<br>N | IL-10<br>Coefficient<br>P<br>N | MIG<br>Coefficient<br>P<br>N | IP-10<br>Coefficient<br>P<br>N |
|-------|-------------------------------|-------------------------------|--------------------------------|------------------------------|--------------------------------|
| IL-8  | 1.0<br>-<br>129               |                               |                                |                              |                                |
| IL-6  | 0.09<br>1.0<br>129            | 1.0<br>-<br>129               |                                |                              |                                |
| IL-10 | -0.01<br>1.0<br>129           | 0.50<br><0.001<br>129         | 1.0<br>-<br>129                |                              |                                |
| MIG   | 0.01<br>1.0<br>129            | 0.24<br>0.06<br>129           | 0.33<br>0.001<br>129           | 1.0<br>-<br>129              |                                |
| IP-10 | 0.01<br>1.0<br>129            | 0.37<br><0.001<br>129         | 0.51<br><0.001<br>129          | 0.68<br><0.001<br>129        | 1.0<br>-<br>129                |

18

19 “P” refers to the level of significance (second number in each box), “N” to the number of

20 individuals included in the comparison (third number in each box).

21 **Table S5:** Pair-wise correlation coefficients of plasma cytokine and chemokine concentrations at  
 22 delivery included in multivariate models (Bonferroni adjustment)

23

|               | IL-1 $\beta$<br>Coefficient<br>P<br>N | IL-10<br>Coefficient<br>P<br>N | TNF- $\alpha$<br>Coefficient<br>P<br>N | IL-12p70<br>Coefficient<br>P<br>N | MIG<br>Coefficient<br>P<br>N | IP-10<br>Coefficient<br>P<br>N | Ang-1<br>Coefficient<br>P<br>N |
|---------------|---------------------------------------|--------------------------------|----------------------------------------|-----------------------------------|------------------------------|--------------------------------|--------------------------------|
| IL-1 $\beta$  | 1.0<br>-<br>106                       |                                |                                        |                                   |                              |                                |                                |
| IL-10         | 0.009<br>1.0<br>106                   | 1.0<br>-<br>106                |                                        |                                   |                              |                                |                                |
| TNF- $\alpha$ | 0.83<br><0.001<br>106                 | -0.008<br>1.0<br>106           | 1.0<br>-<br>106                        |                                   |                              |                                |                                |
| IL-12p70      | -0.002<br>1.0<br>106                  | -0.01<br>1.0<br>106            | 0.45<br><0.001<br>106                  | 1.0<br>-<br>106                   |                              |                                |                                |
| MIG           | 0.32<br>0.01<br>106                   | 0.66<br><0.001<br>106          | 0.30<br>0.04<br>106                    | -0.04<br>1.0<br>106               | 1.0<br>-<br>106              |                                |                                |
| IP-10         | 0.09<br>1.0<br>106                    | 0.66<br><0.001<br>106          | 0.08<br>1.0<br>106                     | -0.02<br>1.0<br>106               | 0.56<br><0.01<br>106         | 1.0<br>-<br>106                |                                |
| Ang-1         | -0.20<br>1.0<br>92                    | 0.08<br>1.0<br>92              | -0.17<br>1.0<br>92                     | -0.10<br>1.0<br>92                | -0.07<br>1.0<br>92           | 0.11<br>1.0<br>92              | 1.0<br>-<br>92                 |

24

25 “P” refers to the level of significance (second number in each box), “N” to the number of

26 individuals included in the comparison (third number in each box).
